# Supplementary material for: Benzoselenadiazole-based responsive long-lifetime photoluminescent probes for protein kinases
Source: Royal Society of Chemistry journal article supplement (doi:10.1039/c3cc49198f), 2014-01-01
Supplement: c3cc49198f1.pdf [file c3cc49198f1.pdf]

## Supporting Information

### Benzoselenadiazole-based responsive long-lifetime photoluminescence probes for protein kinases

Ramesh Ekambaram,<sup>a</sup> Erki Enkvist,<sup>a</sup> Ganesh babu Manoharan,<sup>a</sup> Mihkel Ugandi,<sup>a</sup> Marje Kasari,<sup>a</sup> Kaido Viht,<sup>a</sup> Stefan Knapp,<sup>b</sup> Olaf-Georg Issinger<sup>c</sup> and Asko Uri<sup>\*a</sup>

<sup>a</sup>Institute of Chemistry, University of Tartu, 14A Ravila St., 50411 Tartu, Estonia. Tel: +372 737 5275; E-mail: asko.uri@ut.ee

<sup>b</sup>Nuffield Department of Clinical Medicine, Structural Genomics Consortium and Target Discovery Institute (TDI), University of Oxford Roosevelt Drive, Oxford OX3 7BN (UK)

<sup>c</sup>Institut for Biokemi og Molekylær Biologi, Syddansk Universitet, Campusvej 55, DK-5230 Odense, Denmark

E-mail: asko.uri@ut.ee

#### Contents

|                                                                                                                                                                  |    |
|------------------------------------------------------------------------------------------------------------------------------------------------------------------|----|
| 1. Materials and methods .....                                                                                                                                   | 2  |
| 2. Synthesis of ARC-compounds .....                                                                                                                              | 3  |
| 3. UV-Visible absorption spectra of compounds .....                                                                                                              | 13 |
| 4. NMR Data .....                                                                                                                                                | 14 |
| 5. HPLC data for purified compounds .....                                                                                                                        | 18 |
| 6. Structures and HRMS data .....                                                                                                                                | 24 |
| 7. Selectivity data .....                                                                                                                                        | 27 |
| 8. ARC-Lum binding assay .....                                                                                                                                   | 28 |
| 9. Inhibition of CK2 $\alpha$ by ARC-3138 and ARC-3141 .....                                                                                                     | 32 |
| 10. Displacement of ARC-3138 and ARC-3168 from the complex with CK2 $\alpha$ . .....                                                                             | 32 |
| 11. Comparison of novel selenadiazole containing probe ARC-3132 with previously reported thiophene (ARC-1182) and selenophene (ARC-1139) containing probes. .... | 33 |
| 12. References.....                                                                                                                                              | 33 |

## 1. Materials and methods

The chemicals and solvents were purchased from Rathburn, Sigma-Aldrich and Scharlau, and used without further purification. Fmoc Rink-amide MBHA resin and Fmoc-protected amino acids were purchased from Iris Biotech. Fluorescent dye PromoFluor-647 NHS ester was purchased from PromoKine.

$^1\text{H}$  and  $^{13}\text{C}$  NMR spectra were taken on Bruker AC 200P and Bruker 400 MHz spectrometers. High resolution mass spectra of all synthesized compounds were measured on Thermo Electron LTQ Orbitrap mass spectrometer. Thermo Scientific NanoDrop 2000c was used for measuring UV-VIS spectra and quantification of the products. Purification of peptide conjugates was performed with Shimadzu LC Solution (Prominence) system with manual injector and a diode array (SPD M20A) detector. Separation was achieved with a Gemini C18 5  $\mu\text{m}$  column (250  $\times$  4.6 mm i.d., Phenomenex) protected by a 5  $\mu\text{m}$  Gemini C18 4  $\times$  2.0 mm guard column.

### Kinases:

Pim-1 kinase,<sup>1</sup> PKAc (bovine full length)<sup>2</sup> and CK2 $\alpha$  (amino acids 1-335)<sup>3</sup> were expressed and purified as described previously.

## 2. Synthesis of ARC-compounds

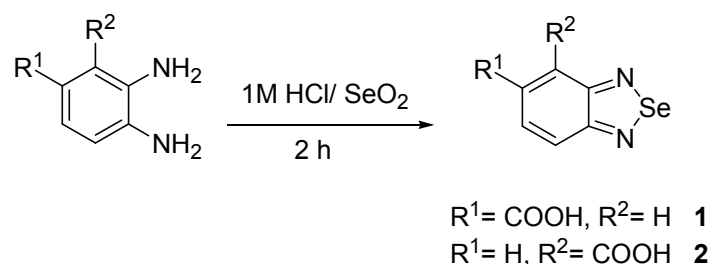

**Scheme S1.** Synthesis of 2,1,3-benzoselenadiazole-5-carboxylic acid (**1**) and 2,1,3-benzoselenadiazole-4-carboxylic acid (**2**).

### Synthesis of 2,1,3-benzoselenadiazole-5-carboxylic acid (**1**)

3,4-Diamino-benzoic acid 151 mg (1 mmol) was dissolved in 3.5 ml of 1M HCl and heated to 80 °C, thereafter 222 mg (2 mmol) of selenium dioxide in 1.5 ml of water was added. The mixture was stirred for 2 h and the brown precipitate was separated, washed with water and dried to get the compound **1** (95%).

$^1\text{H}$  NMR (200 MHz,  $\text{DMSO}_{\text{d}_6}$ )  $\delta$  7.89-8.01 (2H, m), 8.43 (1H, s), 13.40 (1H, br).

$^{13}\text{C}$  NMR (50 MHz,  $\text{DMSO}_{\text{d}_6}$ )  $\delta$  123.1, 125.3, 127.8, 131.2, 159.1, 160.6, 166.7.

ESI-HRMS  $m/z$  calcd for  $\text{C}_7\text{H}_4\text{N}_2\text{O}_2\text{Se}$   $[\text{M}+\text{H}]^+$  228.95108, found 228.95103.

### Synthesis of 2,1,3-benzoselenadiazole-4-carboxylic acid (**2**)

Synthesis of **2** was performed by the procedure described for **1**, starting from 2,3-diaminobenzoic acid. Yield 97%.

$^1\text{H}$  NMR (200 MHz,  $\text{DMSO}_{\text{d}_6}$ )  $\delta$  7.65 (1H, dd,  $J = 9.0$  Hz and 6.8 Hz), 8.07-8.14 (2H, m), 13.2 (1H, br).

$^{13}\text{C}$  NMR (50 MHz,  $\text{DMSO}_{\text{d}_6}$ )  $\delta$  125.6, 127.4, 128.3, 132.3, 156.4, 160.1, 165.8.

ESI-HRMS  $m/z$  calcd for  $\text{C}_7\text{H}_4\text{N}_2\text{O}_2\text{Se}$   $[\text{M}+\text{H}]^+$  228.95108, found 228.95087.

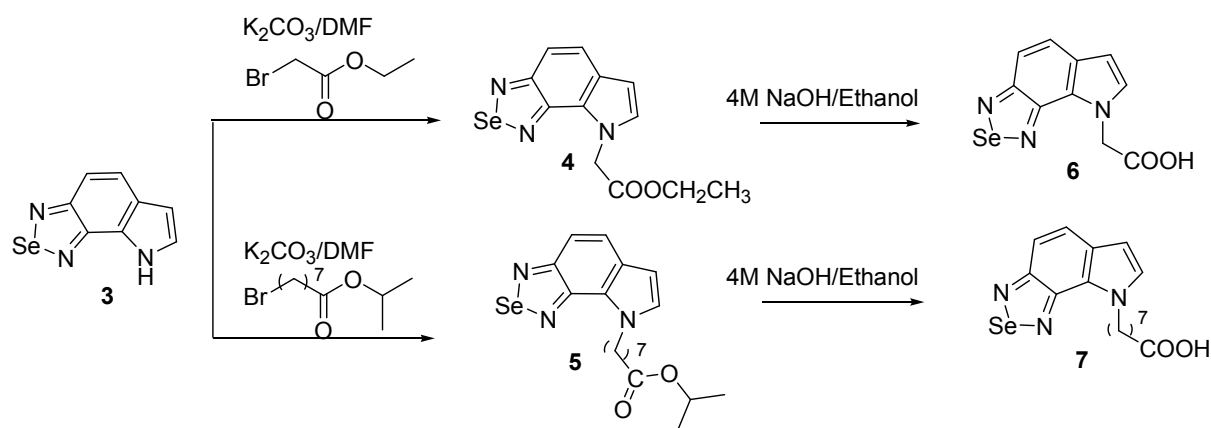

**Scheme S2.** Synthesis of 1,2,5-selenadiazolo[3,4-g]indol-yl-acetic acid (**6**) and 1,2,5-Selenadiazolo[3,4-g]indol-yl-octanoic acid (**7**)

Compound **3** (1 eq) and  $K_2CO_3$  (1.5 eq) in 4 ml of DMF were stirred at room temperature for 10 min, then ethyl bromoacetate or isopropyl ester of 8-bromooctanoic acid (1.2 eq) was added. The reaction mixture was stirred at room temperature overnight. The reaction was quenched by the addition of water. The mixture was partitioned between EtOAc and brine. The organic layer was dried over  $Na_2SO_4$ , filtered and concentrated. The esters (**4** and **5**) were treated with 4 M NaOH/ethanol at 60 °C. After 3 h the reaction mixture was neutralized with 1 M HCl, then partitioned between EtOAc and brine. The organic layer was dried over  $Na_2SO_4$ , concentrated and purified by silica gel column chromatography to yield acids **6** (65%) and **7** (47%).

#### 1,2,5-Selenadiazolo[3,4-g]indol-yl-acetic acid (**6**):

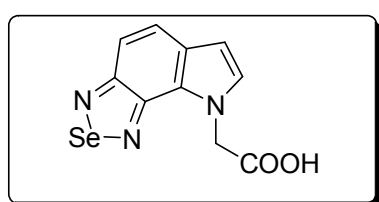

$^1H$  NMR (200 MHz,  $DMSO_{d6}$ )  $\delta$  5.48 (2H, s), 6.57 (1H, d,  $J = 2.8$  Hz), 7.35 (1H, d,  $J = 9.2$  Hz), 7.42 (1H, d,  $J = 2.8$  Hz), 7.74 (1H, d,  $J = 9.2$  Hz), 13.03 (1H, br).  $^{13}C$  NMR (50 MHz,  $DMSO_{d6}$ )  $\delta$  50.0, 104.1, 115.6, 125.0, 125.9, 126.8, 129.4, 150.8, 159.8, 170.2. HRMS  $m/z$  calcd monoisotopic mass for  $C_{10}H_7N_3O_2Se$  280.97035, found: 280.97037.

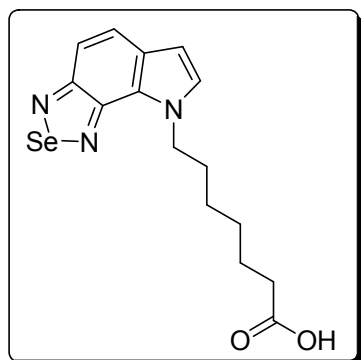

#### 1,2,5-Selenadiazolo[3,4-g]indol-yl-octanoic acid (**7**):

$^1H$  NMR (400 MHz,  $CDCl_3$ )  $\delta$  1.37 (6H, m), 1.61 (2H, quin,  $J = 7.2$  Hz), 1.94 (2H, quin,  $J = 7.2$  Hz), 2.32 (2H, t,  $J = 7.2$  Hz), 4.71 (2H, t,  $J = 7.2$  Hz), 6.49 (1H, d,  $J = 2.8$  Hz), 7.10 (1H, d,  $J = 2.8$  Hz), 7.37 (1H, d,  $J = 9.2$  Hz), 7.65 (1H, d,  $J = 9.2$  Hz).  $^{13}C$

NMR (100 MHz,  $\text{CDCl}_3$ )  $\delta$  24.6, 26.4, 28.83, 28.87, 31.1, 33.7, 49.7, 103.9, 115.7, 125.71, 125.76, 127.1, 127.3, 151.1, 160.8, 178.1. HRMS  $m/z$  calcd monoisotopic mass for  $\text{C}_{16}\text{H}_{19}\text{N}_3\text{O}_2\text{Se}$  365.06425, found: 365.06393.

## Synthesis of peptide conjugates

Peptide fragments were prepared by using traditional Fmoc solid phase peptide synthesis on Rink amide MBHA resin. In general, protected amino acids (3 eq) were dissolved in DMF and activated with HBTU/HOBt (2.8 eq each) in the presence of *N*-methylmorpholine (9 eq). Coupling solutions were added to the resin and shaken for 1 h. The resin was washed 5 times with DMF. The completeness of each coupling step was monitored with Kaiser test. The *N*-terminal Fmoc group was removed with 20% piperidine solution in DMF (20 min) and the resin was washed 5 times with DMF.

A selenadiazole carboxylic acid (3 eq) was activated with HBTU/HOBt (2.8 eq each) in DMF in the presence of *N*-methylmorpholine (9 eq). Coupling solutions were added to the resin and shaken for 3 h. The resins were washed 5 times with each solvent (DMF, isopropanol, DCE) and dried. Finally the protection groups were removed and the conjugates cleaved from the resin by 2 h treatment with a mixture of trifluoroacetic acid, triisopropylsilane and water (90:5:5, by volume). The conjugates were purified with C18 reversed phase HPLC and lyophilized.

## Labelling of peptide conjugates with the fluorescent dye PromoFlour-647

Peptide conjugate (ARC-1601, ARC-1608, ARC-3131 and ARC-3138) and NHS ester of PromoFlour-647 were dissolved in DMSO and  $\text{Et}_3\text{N}$ . After 3 h reaction the solvents were removed in vacuum and the products were purified by HPLC with C18 reverse phase column to yield ARC-1602, ARC-1609, ARC-3132 and ARC-3141, respectively.

## Synthesis of ARC-3168

ARC-3138 (13 nmol) was treated with  $\text{Ac}_2\text{O}$  (2 eq) and  $\text{Et}_3\text{N}$  (1  $\mu\text{l}$ ) in DMF (50  $\mu\text{l}$ ) overnight. The solvent was removed in vacuum and the residue was purified by HPLC with C18 reverse phase column to yield ARC-3168.

### Synthesis of peptide conjugates : ARC-1601

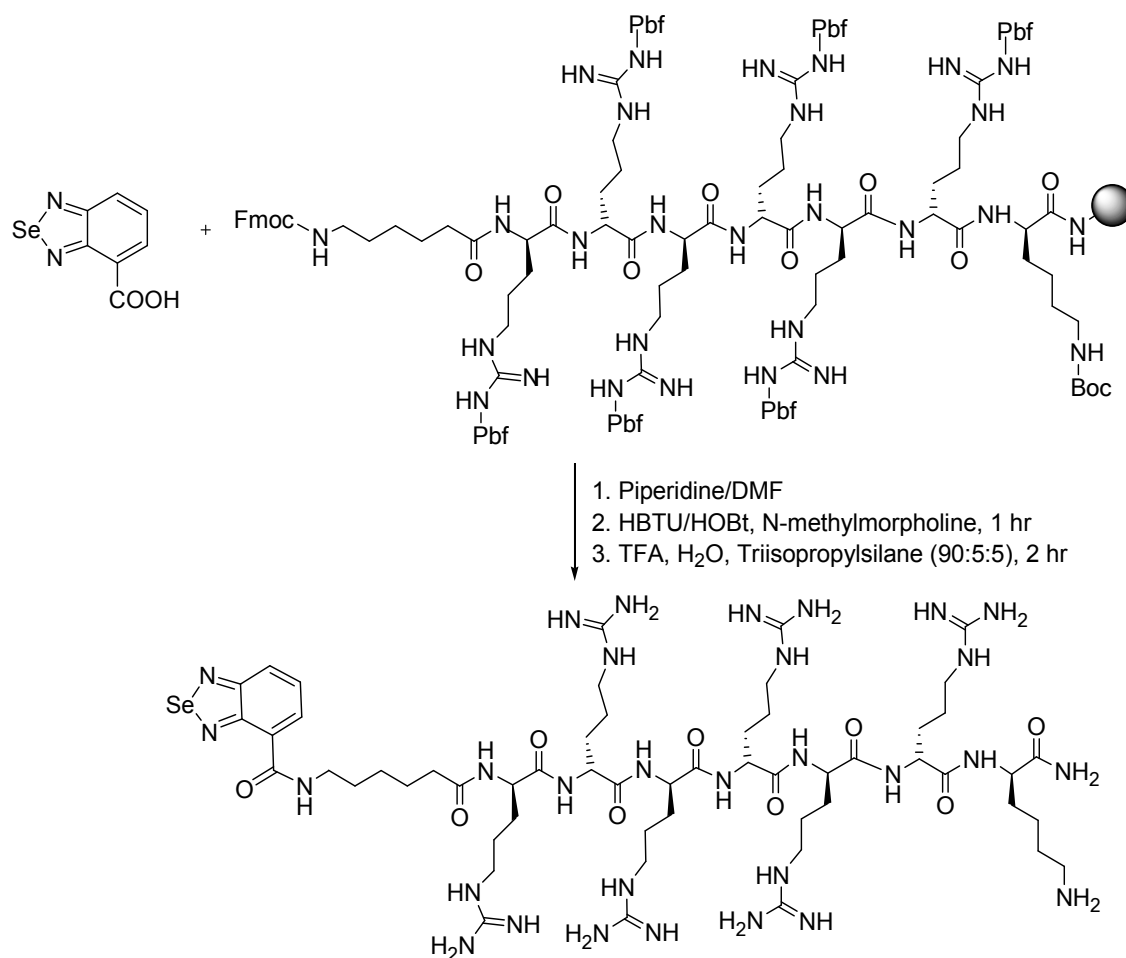

**Synthesis of peptide conjugates : ARC-1602**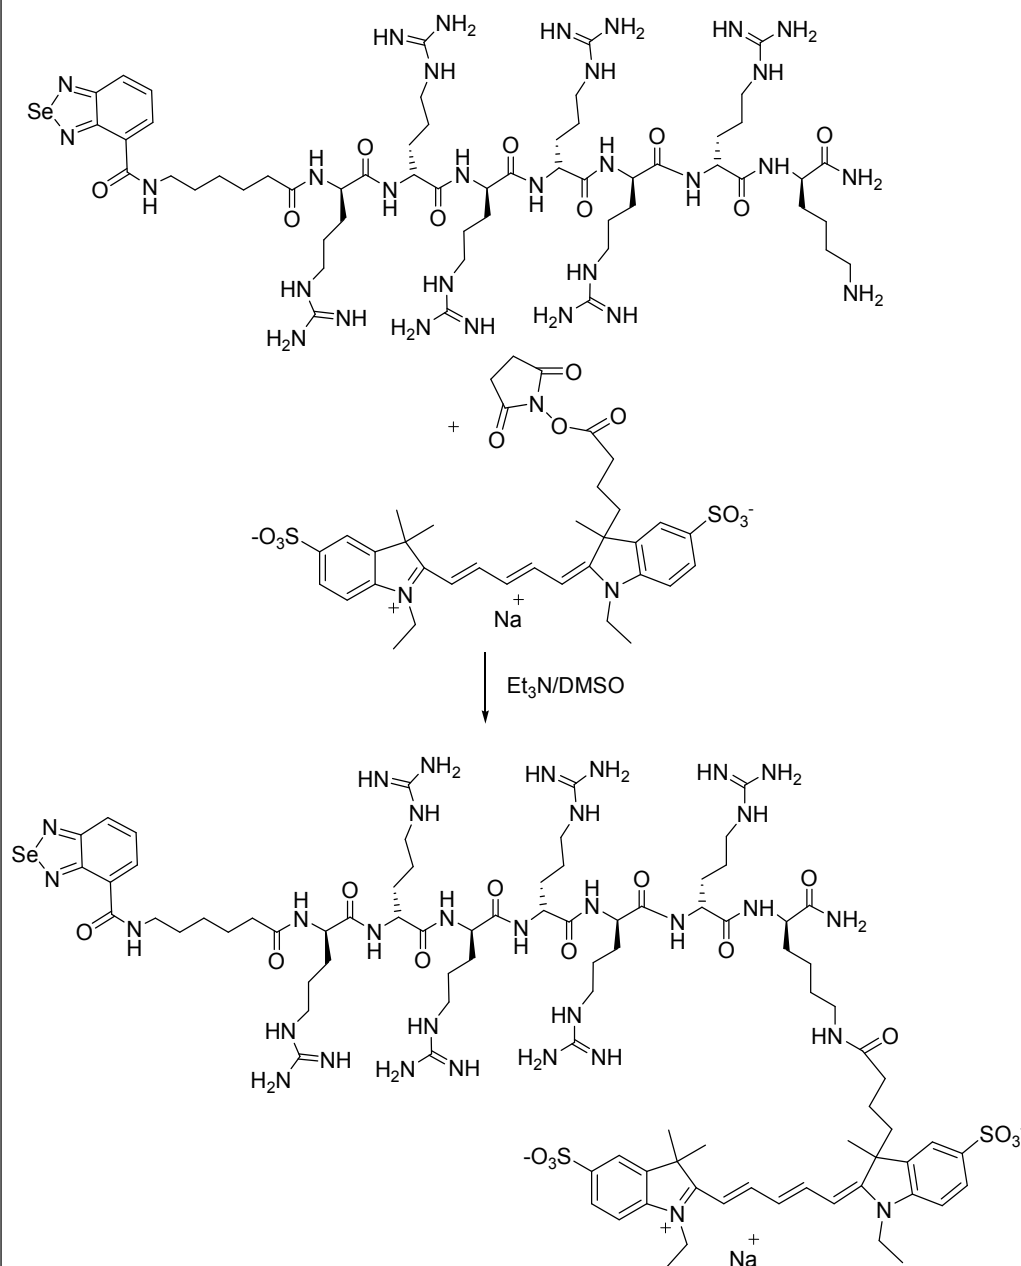

### Synthesis of peptide conjugates : ARC-1608

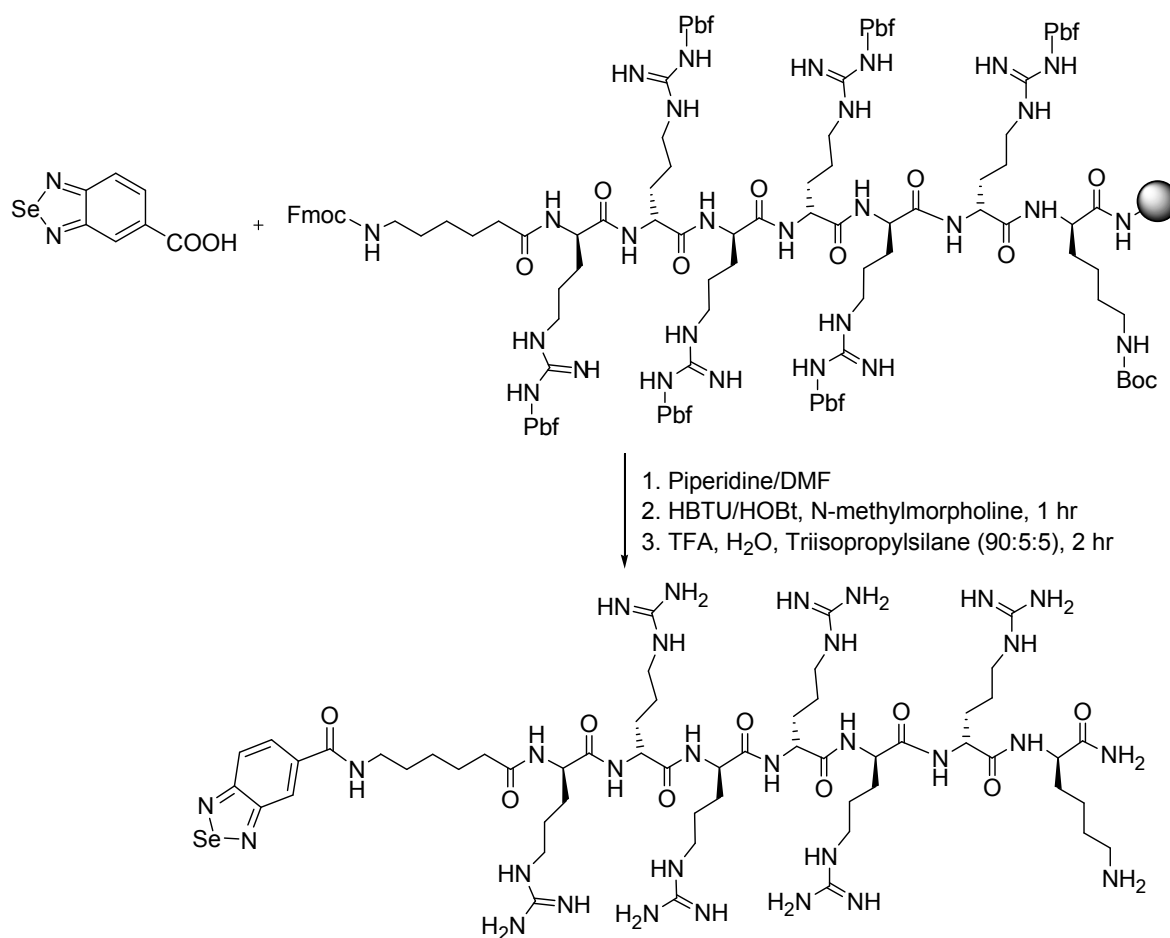



**Synthesis of peptide conjugates : ARC-1609**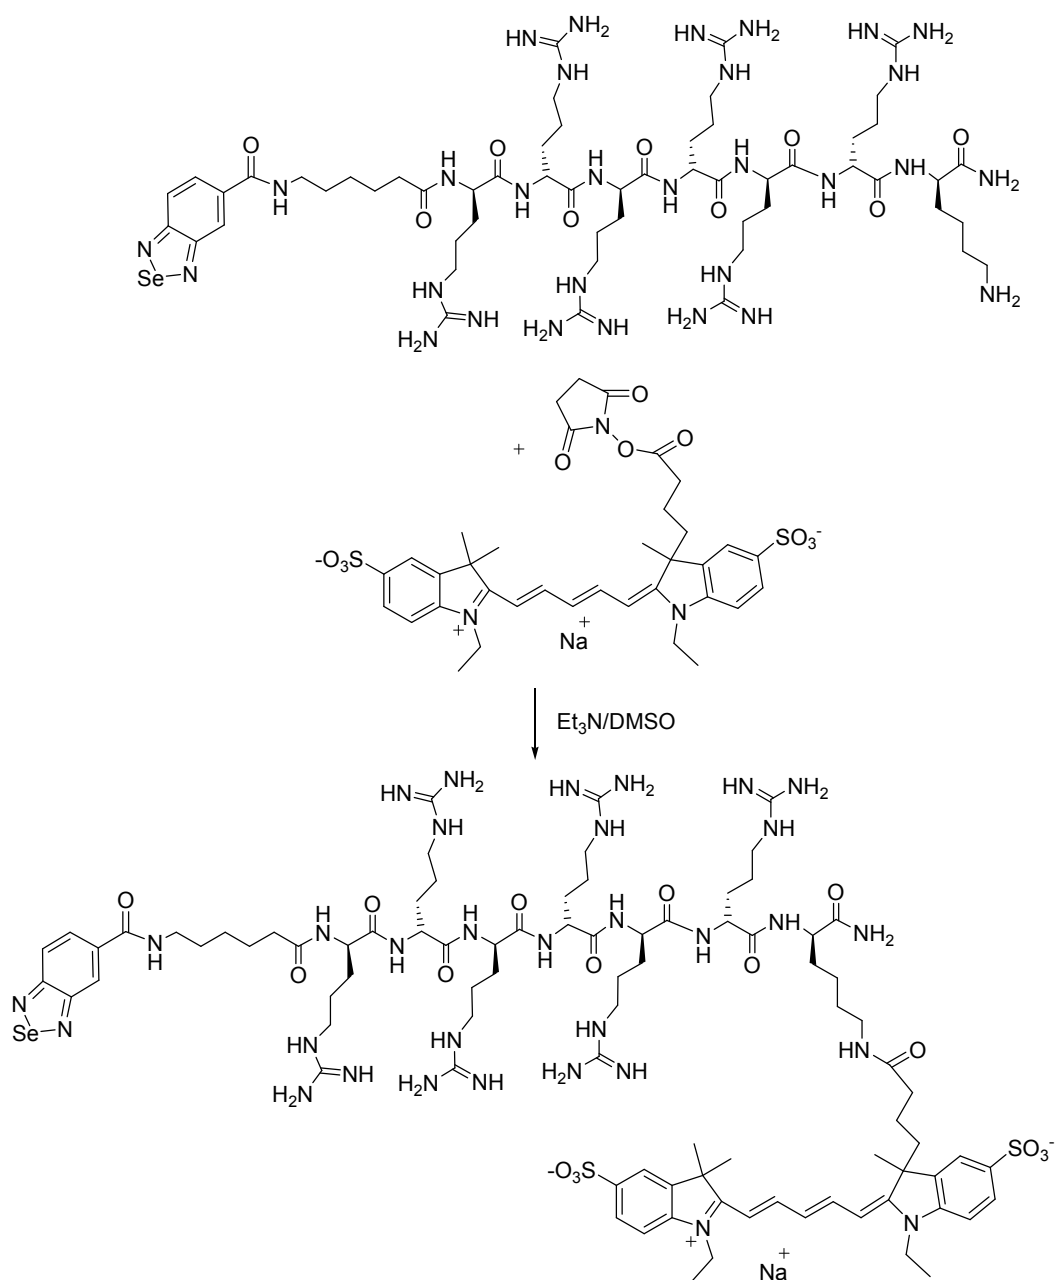



**Synthesis of peptide conjugates : ARC-3132**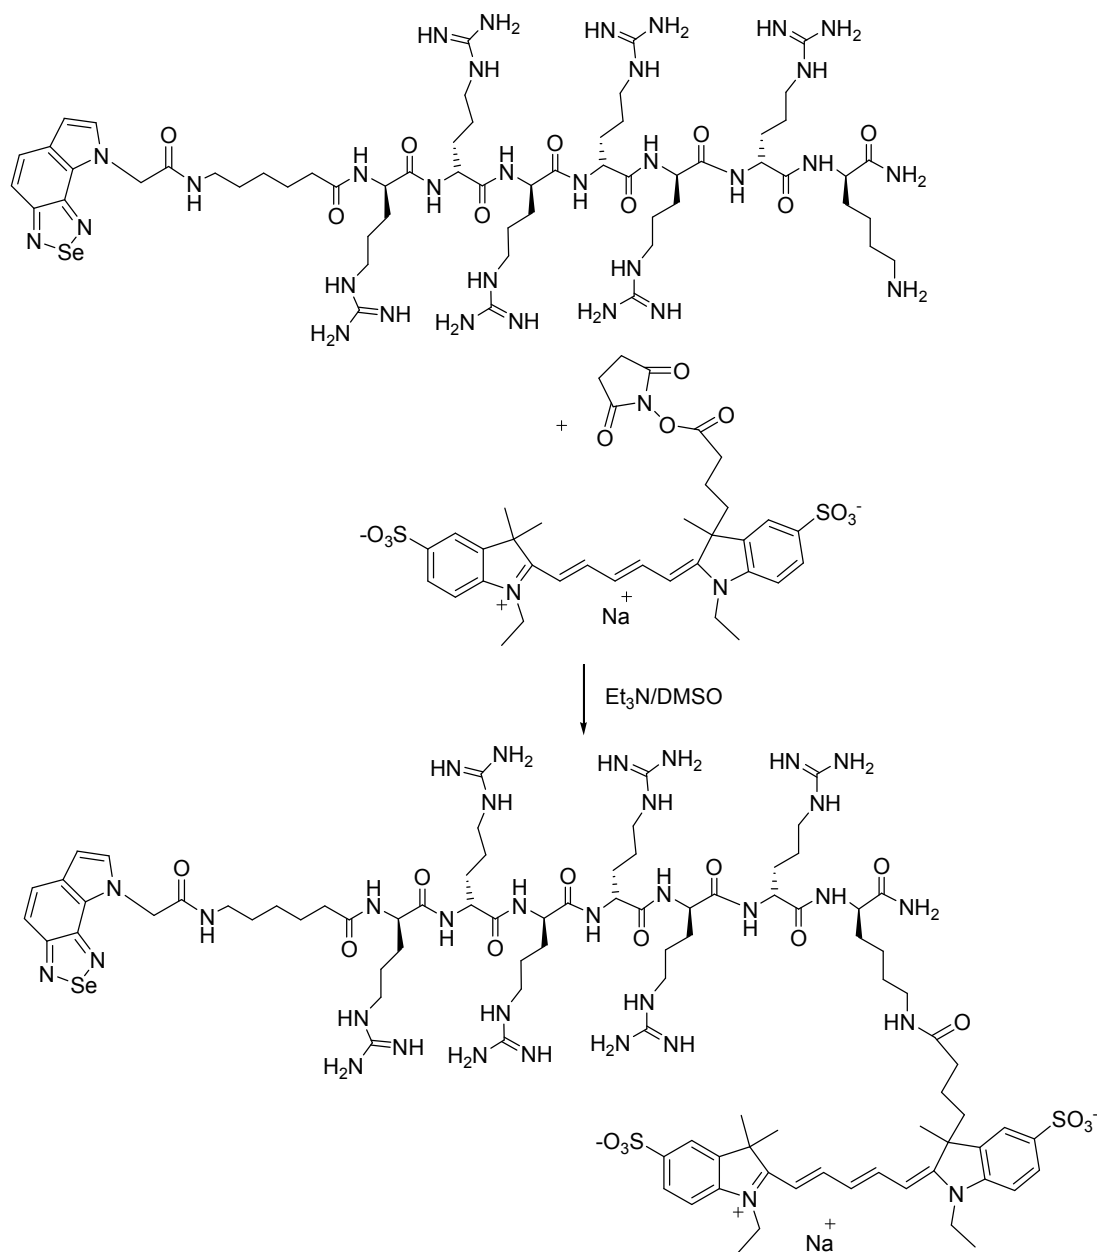

### Synthesis of peptide conjugates : ARC-3138

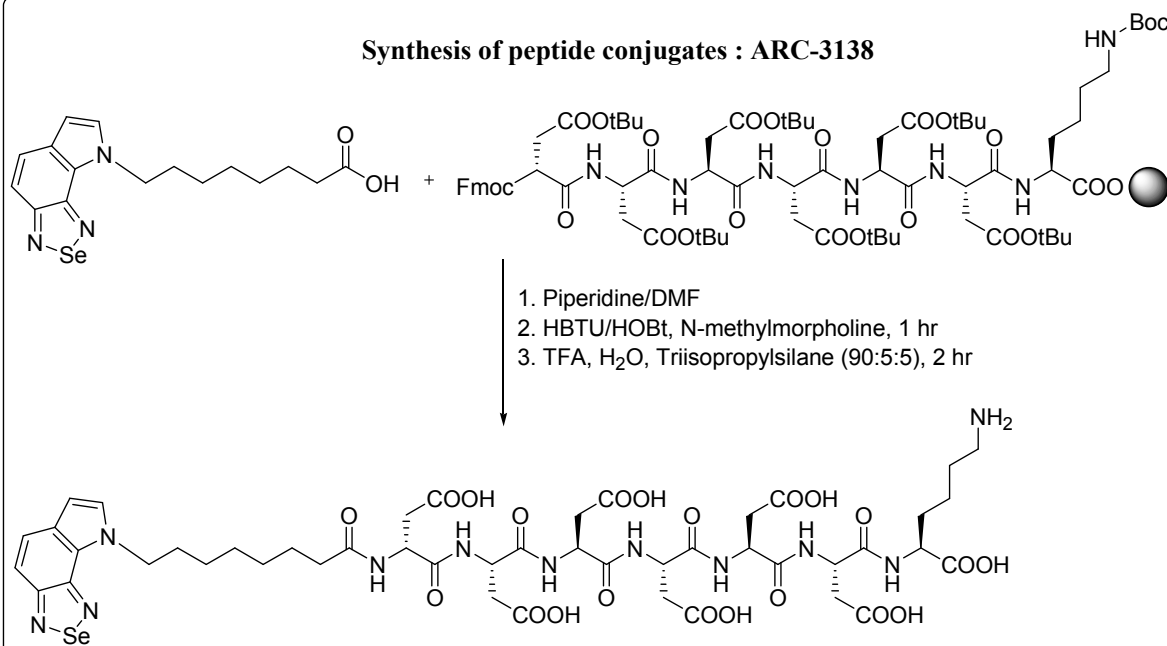

### Synthesis of peptide conjugates: ARC-3141

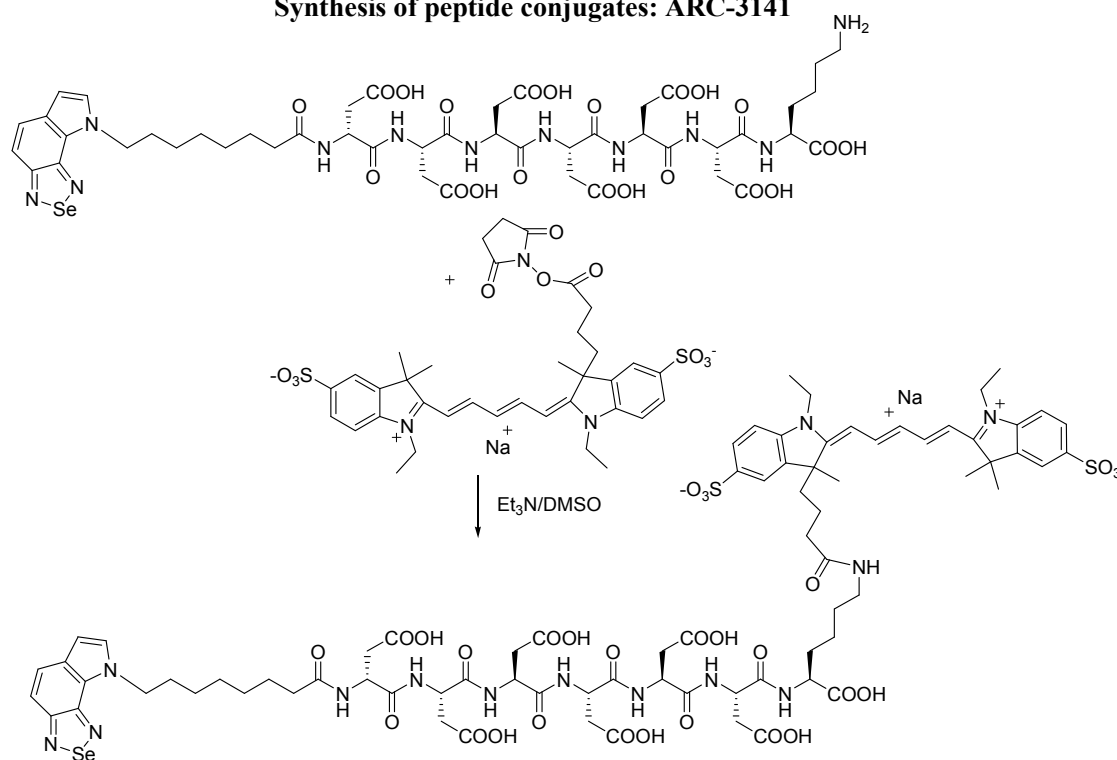

### 3. UV-Visible absorption spectra of compounds

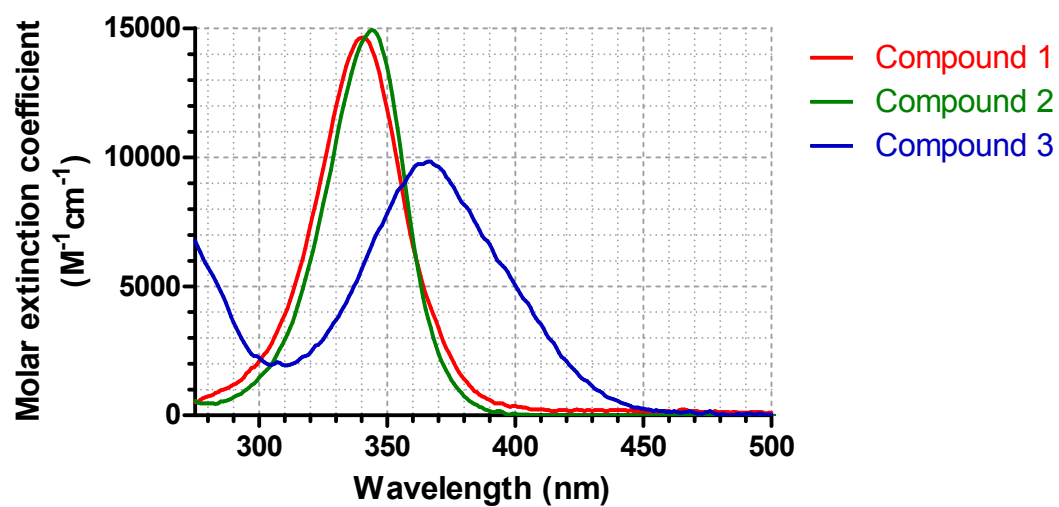

**Figure S1.** UV-Visible spectra of compounds 1, 2, 3 at 0.4 mM concentration (aqueous solution, pH 7.5).

## 4. NMR Data

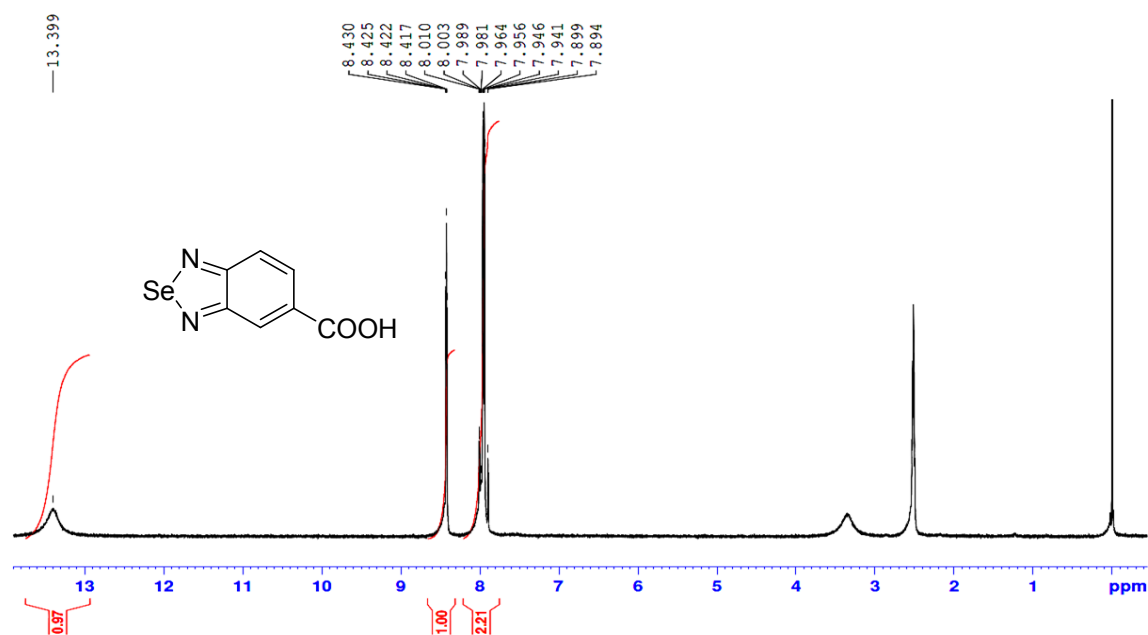

<sup>1</sup>H NMR spectrum of compound **1**.

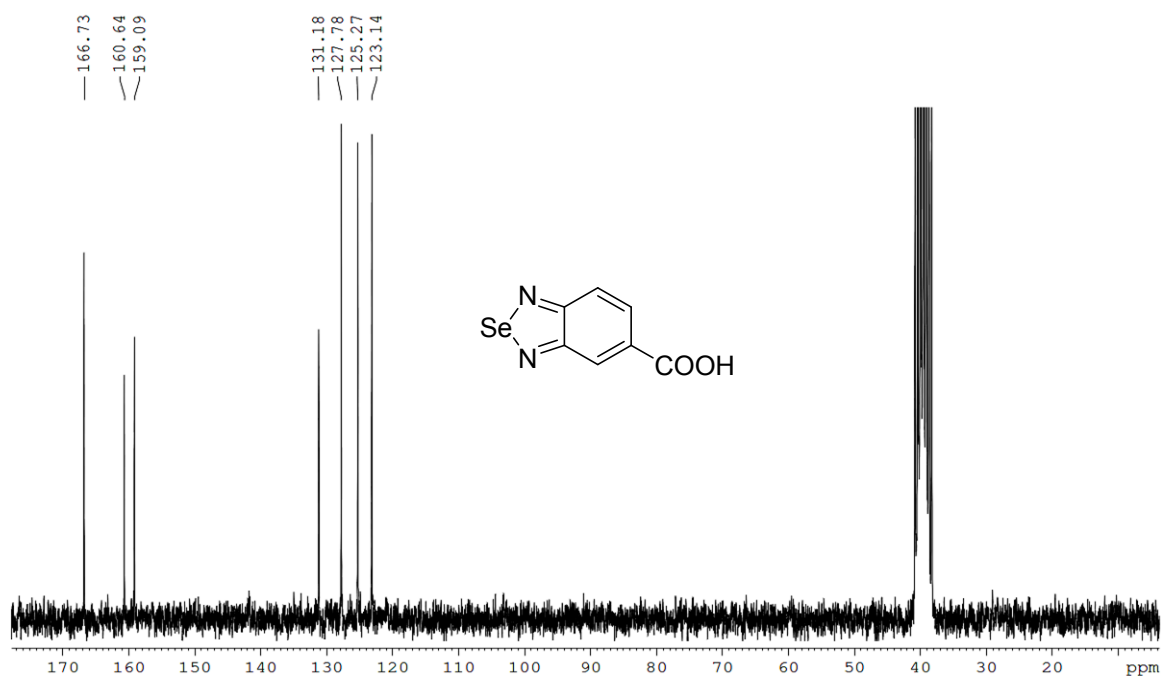

<sup>13</sup>C NMR spectrum of compound **1**.

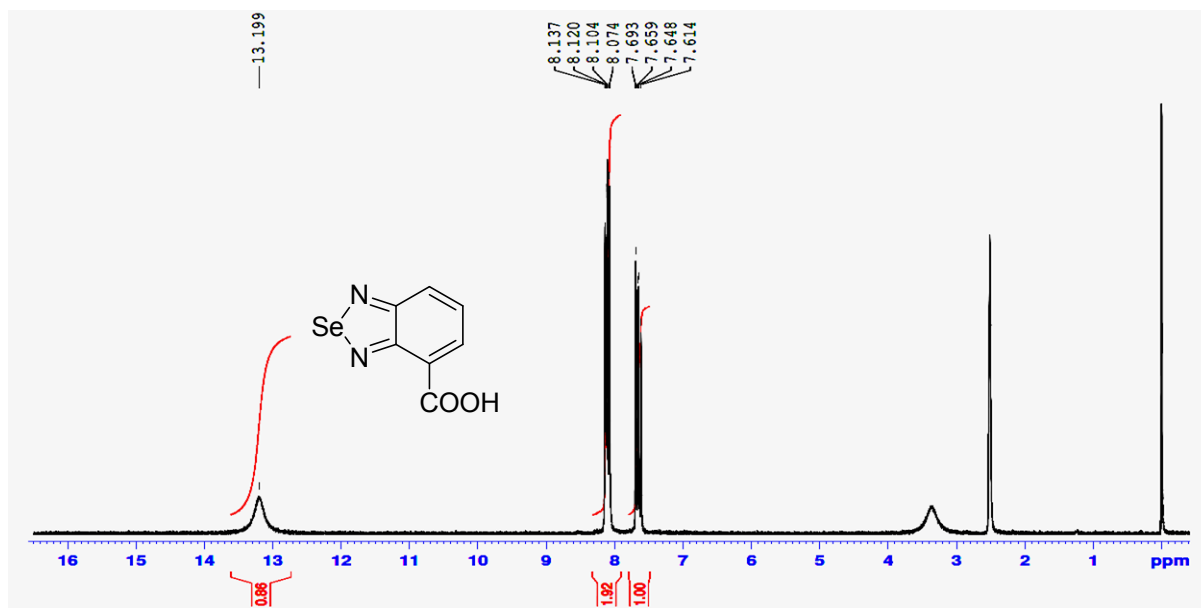

<sup>1</sup>H NMR spectrum of compound **2**.

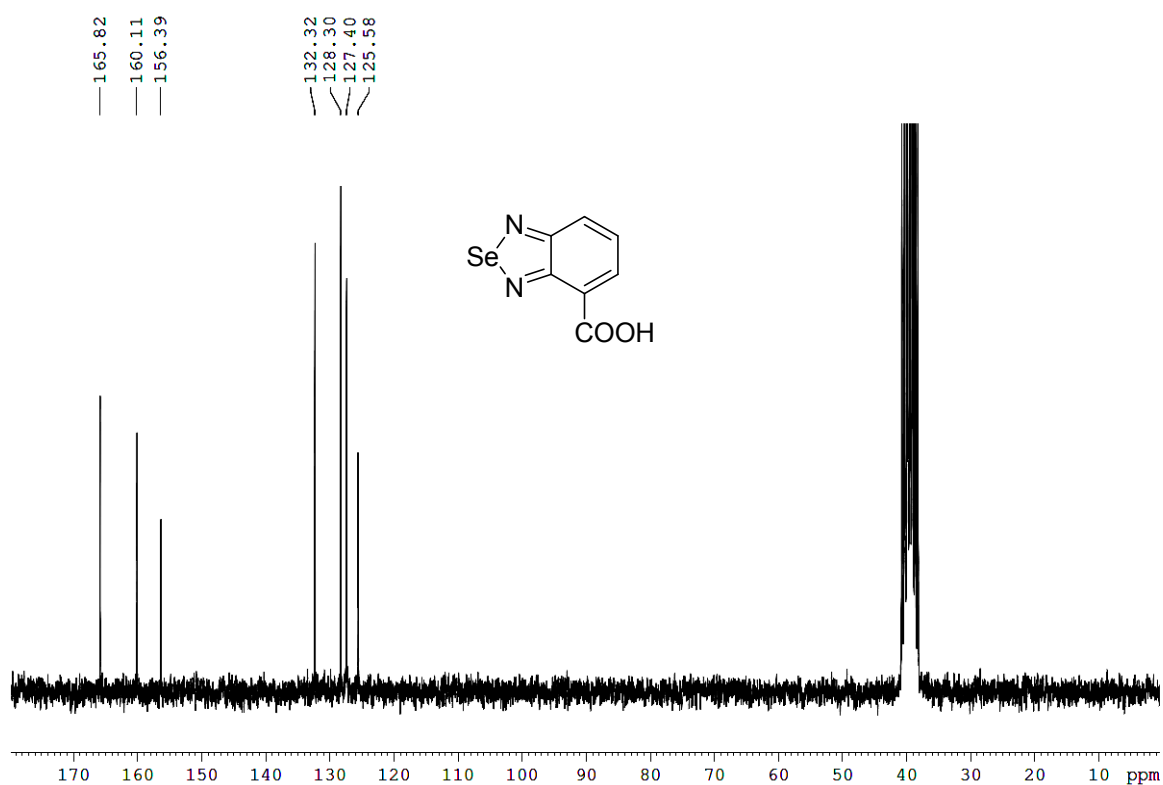

<sup>13</sup>C NMR spectrum of compound **2**.

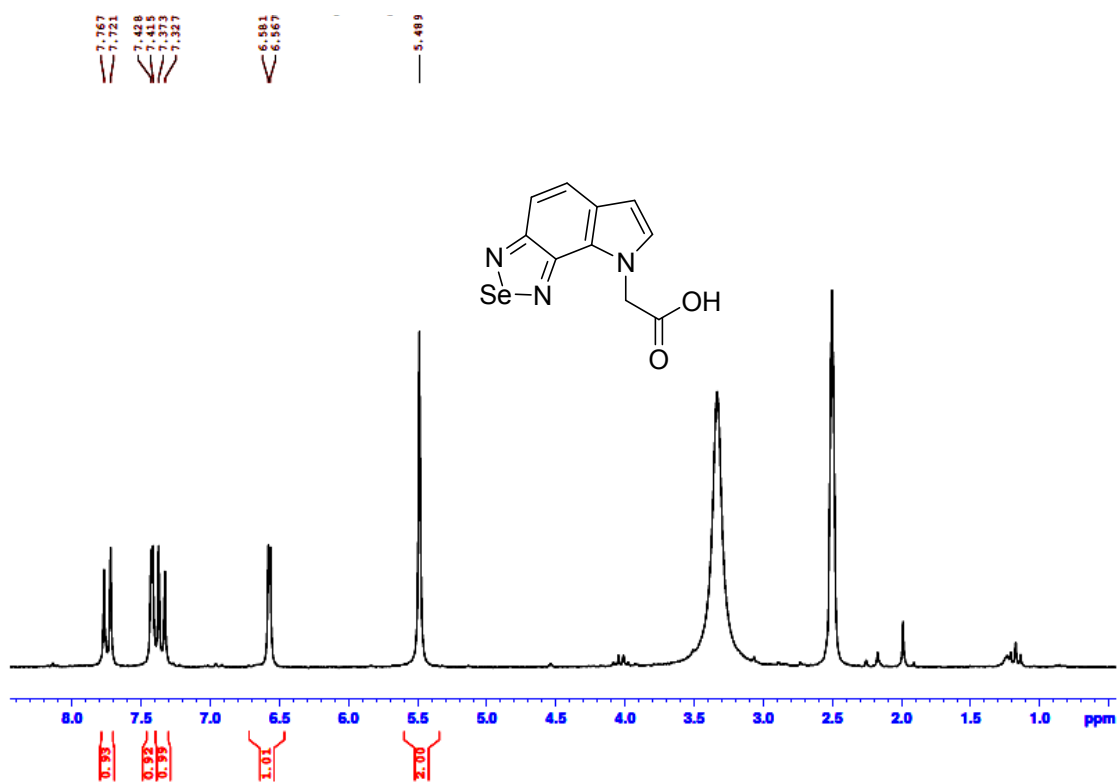

<sup>1</sup>H NMR spectrum of compound 6.

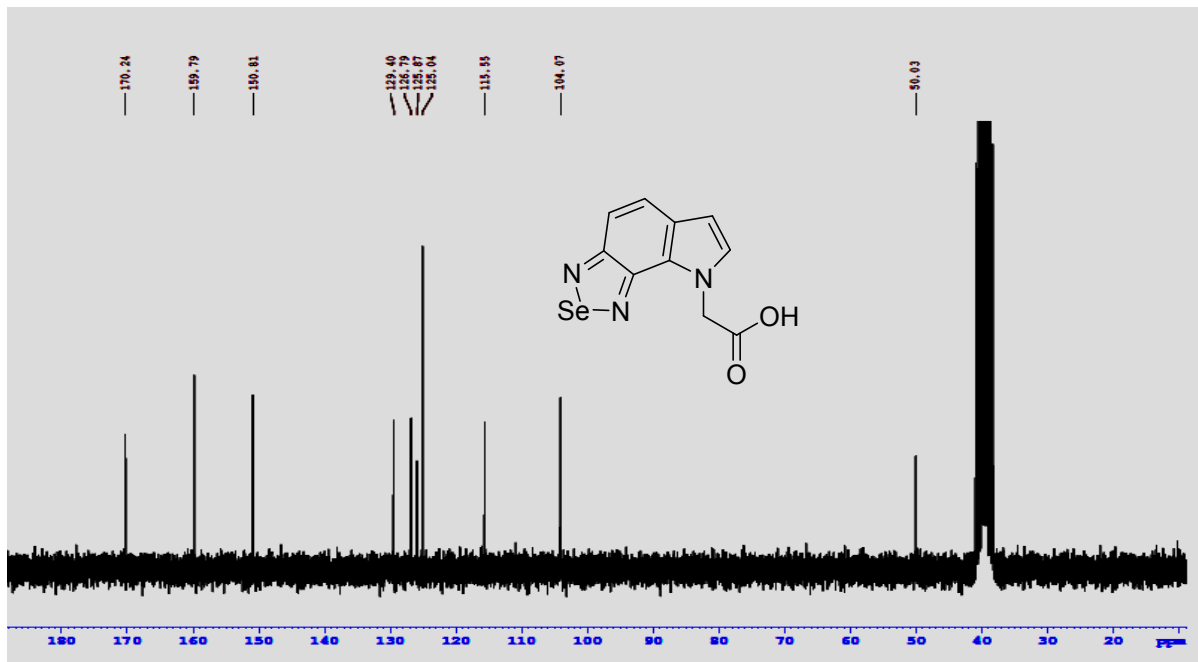

<sup>13</sup>C NMR spectrum of compound 6.



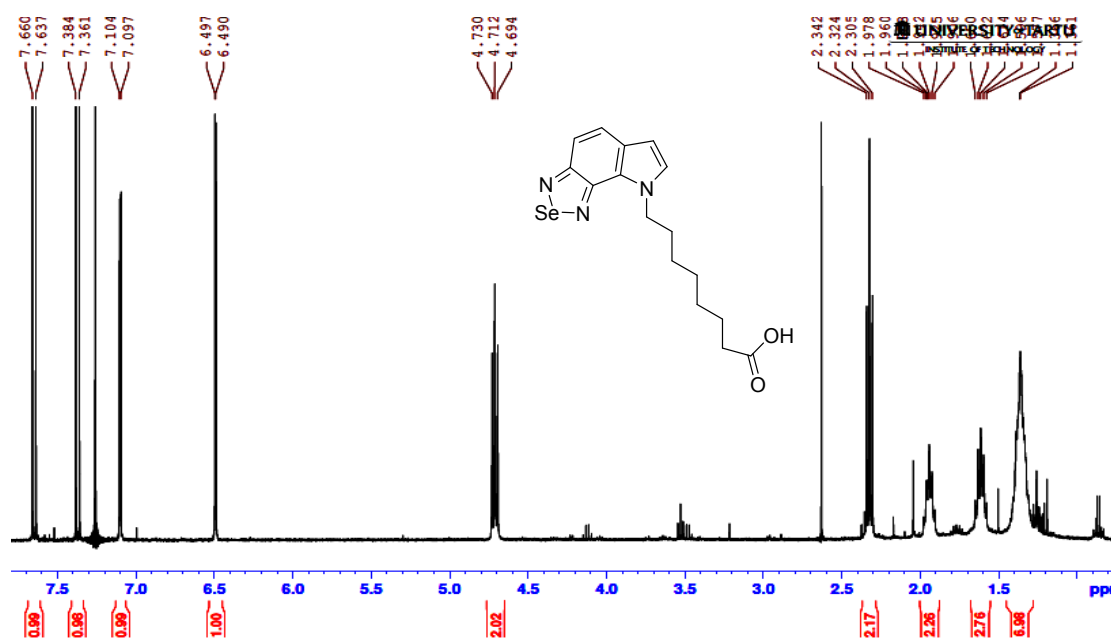

<sup>1</sup>H NMR spectrum of compound 7.

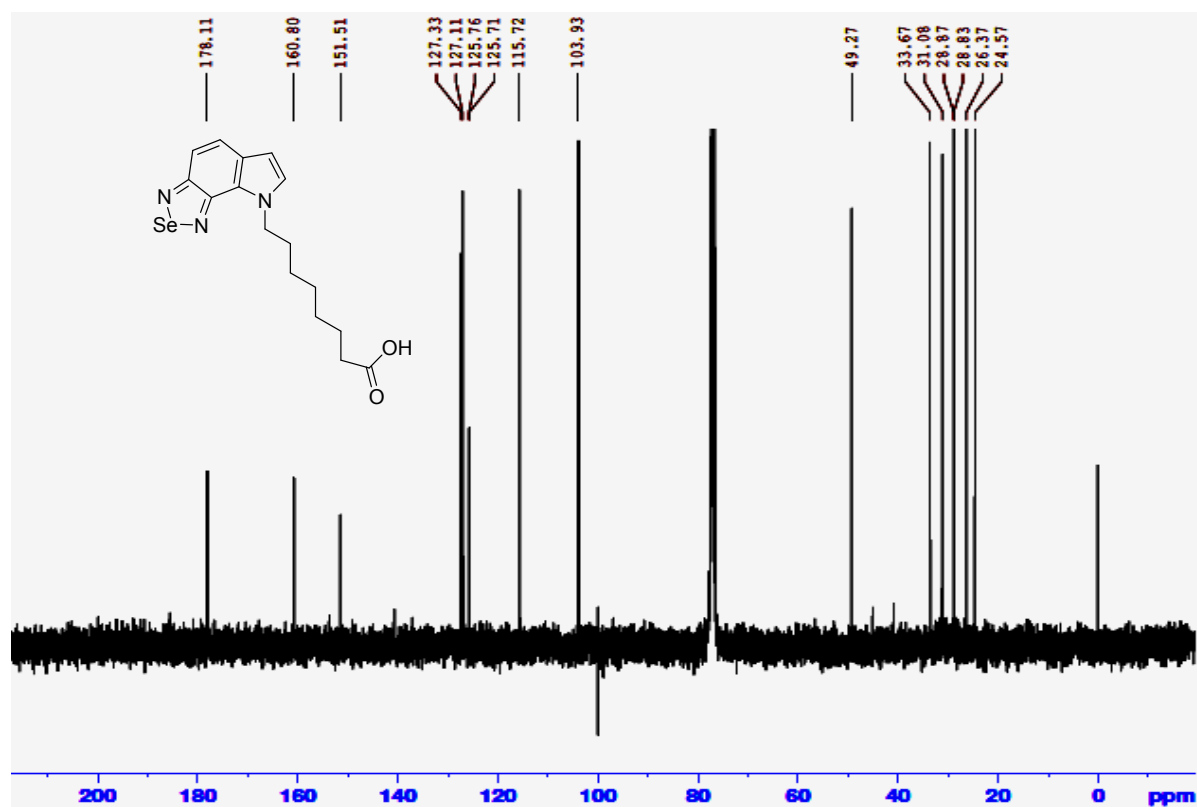

<sup>13</sup>C NMR spectrum of compound 7.

## 5. HPLC data for purified compounds

### HPLC separation of the compounds

The mobile phase for gradient HPLC consisted of solution A (0.1% TFA) and solution B (0.1% TFA in ACN). The flow rate was 1 ml/min. Linear gradient and elution were started at 3 min.

**Table S1.**

| Compound code | Molecular formula                | Gradient speed<br>ACN% | Retention<br>time, $t_R$ (min) | Purity, area %<br>of HPLC peak |
|---------------|----------------------------------|------------------------|--------------------------------|--------------------------------|
| ARC-3131      | $C_{58}H_{103}N_{31}O_9Se$       | 5%-40%/30 min          | 14.0                           | 100                            |
| ARC-3132      | $C_{90}H_{139}N_{33}O_{16}S_2Se$ | 10%-60%/30min          | 13.7                           | 100                            |
| ARC-3138      | $C_{46}H_{61}N_{11}O_{21}Se$     | 5%-40%/30 min          | 27.7                           | 100                            |
| ARC-3141      | $C_{78}H_{97}N_{13}O_{28}S_2Se$  | 10%-60%/30min          | 23.3                           | 100                            |
| ARC-3168      | $C_{48}H_{63}N_{11}O_{22}Se$     | 10%-60%/30min          | 24.5                           | 100                            |
| ARC-1601      | $C_{55}H_{100}N_{30}O_9Se$       | 5%-40%/30 min          | 11.4                           | 100                            |
| ARC-1602      | $C_{87}H_{136}N_{32}O_{16}S_2Se$ | 10%-60%/30min          | 12.5                           | 100                            |
| ARC-1608      | $C_{55}H_{100}N_{30}O_9Se$       | 5%-40%/30 min          | 10.0                           | 99.2                           |
| ARC-1609      | $C_{87}H_{136}N_{32}O_{16}S_2Se$ | 5%-60%/30 min          | 13.8                           | 100                            |

### Chromatograms

ARC-3131

Gradient 5%-40%ACN/30 min

Purity 100%

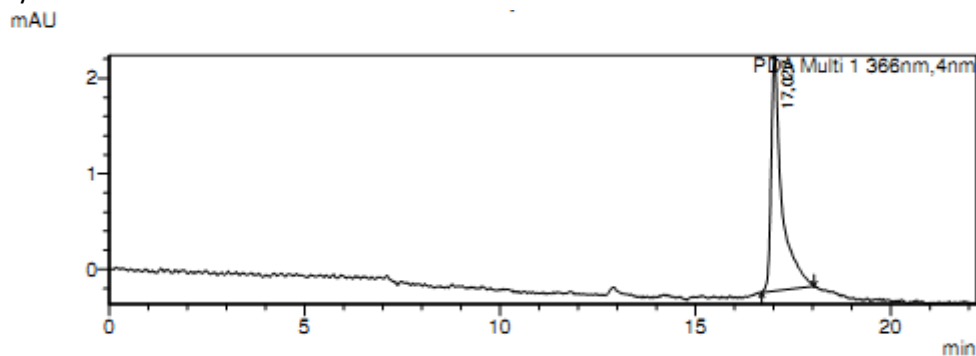

Peak Table

| Peak# | Ret. Time | Area  | Height | Height% | Area%   |
|-------|-----------|-------|--------|---------|---------|
| 1     | 17.027    | 46569 | 2463   | 100,000 | 100,000 |
| Total |           | 46569 | 2463   | 100,000 | 100,000 |

ARC-3132

Gradient 10%-60%ACN/30 min

Purity 100%

mAU

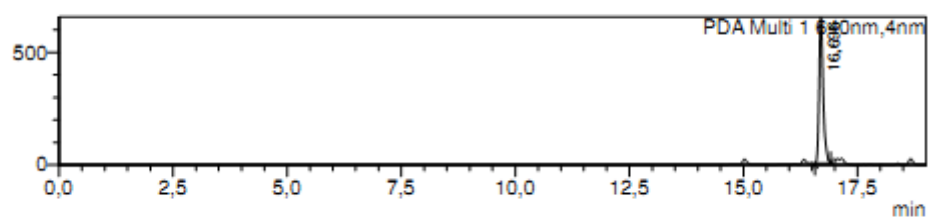

Peak Table

PDA Ch1 640nm

| Peak# | Ret. Time | Area    | Height | Height% | Area%   |
|-------|-----------|---------|--------|---------|---------|
| 1     | 16,696    | 4093607 | 648925 | 100,000 | 100,000 |
| Total |           | 4093607 | 648925 | 100,000 | 100,000 |

ARC-3138

Gradient 5%-40%ACN/30 min

Purity 100%

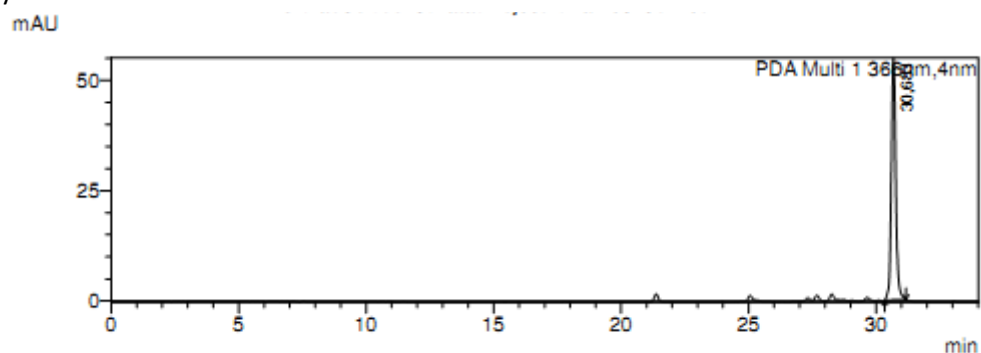

Peak Table

PDA Ch1 366nm

| Peak# | Ret. Time | Area   | Height | Height% | Area%   |
|-------|-----------|--------|--------|---------|---------|
| 1     | 30.683    | 664693 | 54859  | 100,000 | 100,000 |
| Total |           | 664693 | 54859  | 100,000 | 100,000 |

ARC-3141

Gradient 10%-60%ACN/30 min

Purity 100%

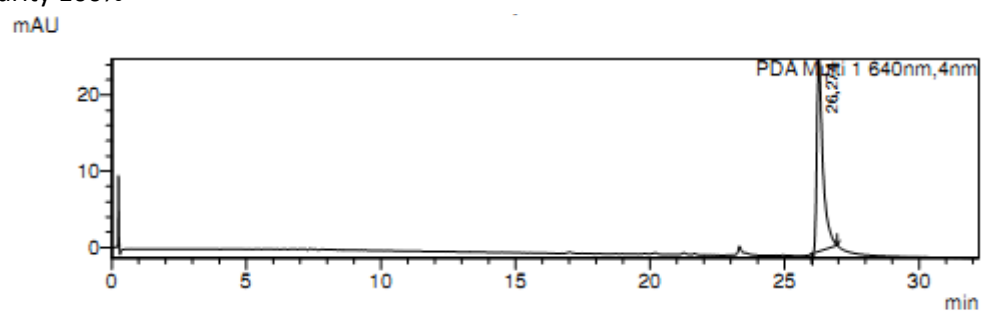

Peak Table

PDA Ch1 640nm

| Peak# | Ret. Time | Area   | Height | Height% | Area%   |
|-------|-----------|--------|--------|---------|---------|
| 1     | 26.274    | 395992 | 25259  | 100,000 | 100,000 |
| Total |           | 395992 | 25259  | 100,000 | 100,000 |

ARC-3168

Gradient 10%-60% ACN/30 min

Purity 100%

mAU

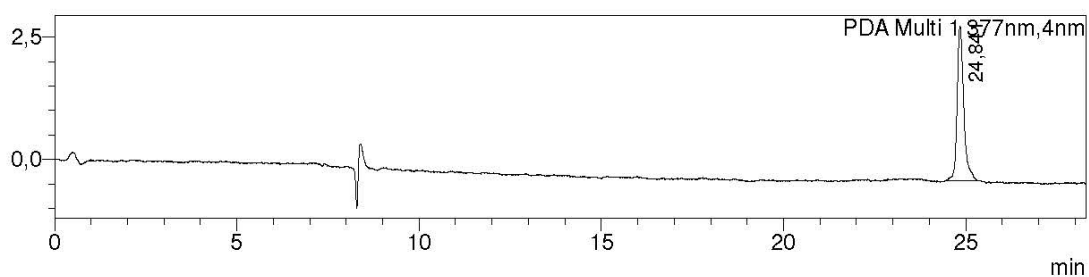

Peak Table

PDA Ch1 377nm

| Peak# | Ret. Time | Area  | Height | Height% | Area%   |
|-------|-----------|-------|--------|---------|---------|
| 1     | 24,841    | 39623 | 3163   | 100,000 | 100,000 |
| Total |           | 39623 | 3163   | 100,000 | 100,000 |

ARC-1601

Gradient 5%-40%ACN/30 min

Purity 100%

mAU

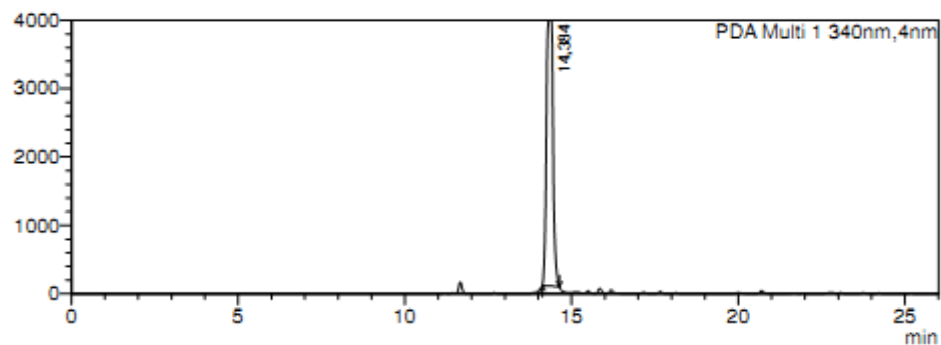

Peak Table

PDA Ch1 340nm

| Peak# | Ret. Time | Area     | Height  | Height% | Area%   |
|-------|-----------|----------|---------|---------|---------|
| 1     | 14,384    | 53501484 | 3887119 | 100,000 | 100,000 |
| Total |           | 53501484 | 3887119 | 100,000 | 100,000 |

ARC-1602

Gradient 10%-60%ACN/30 min

Purity 100%

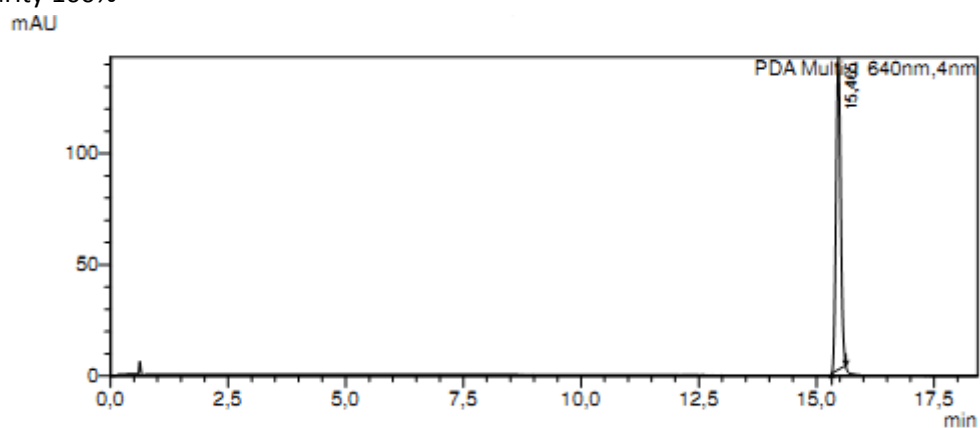

Peak Table

PDA Ch1 640nm

| Peak# | Ret. Time | Area   | Height | Height% | Area%   |
|-------|-----------|--------|--------|---------|---------|
| 1     | 15.465    | 973453 | 140285 | 100,000 | 100,000 |
| Total |           | 973453 | 140285 | 100,000 | 100,000 |

ARC 1608

Gradient 5%-40%ACN/30 min

Purity 98.4%

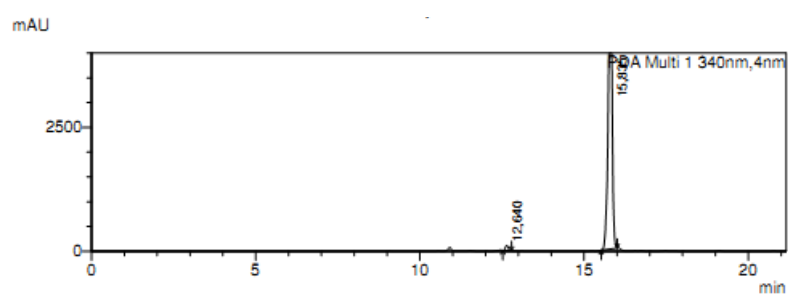

Peak Table

PDA Ch1 340nm

| Peak# | Ret. Time | Area     | Height  | Height% | Area%   |
|-------|-----------|----------|---------|---------|---------|
| 1     | 12.640    | 662759   | 104700  | 2,583   | 1,602   |
| 2     | 15.835    | 40714419 | 3948428 | 97,417  | 98,398  |
| Total |           | 41377177 | 4053128 | 100,000 | 100,000 |

ARC 1609

Gradient 10%-60%ACN/30 min

Purity 100%

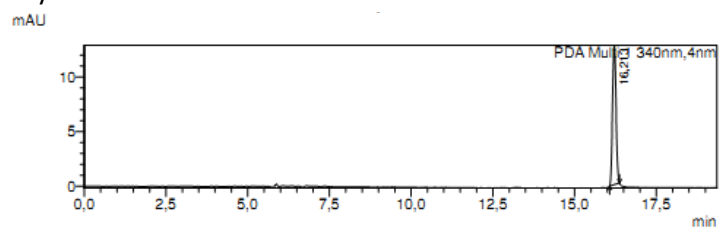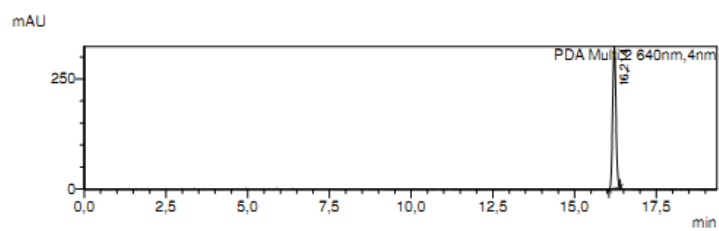

Peak Table

PDA Ch1 340nm

| Peak# | Ret. Time | Area  | Height | Height% | Area%   |
|-------|-----------|-------|--------|---------|---------|
| 1     | 16,213    | 95148 | 12733  | 100,000 | 100,000 |
| Total |           | 95148 | 12733  | 100,000 | 100,000 |

Peak Table

PDA Ch2 640nm

| Peak# | Ret. Time | Area    | Height | Height% | Area%   |
|-------|-----------|---------|--------|---------|---------|
| 1     | 16,214    | 2258701 | 323167 | 100,000 | 100,000 |
| Total |           | 2258701 | 323167 | 100,000 | 100,000 |

## 6. Structures and HRMS data

**Table S2.** Compound codes, structures and HRMS data of compounds. Deconvoluted monoisotopic masses are presented

| Code     | Structure                                                                                                                                                                                                                                          | HRMS found |
|----------|----------------------------------------------------------------------------------------------------------------------------------------------------------------------------------------------------------------------------------------------------|------------|
| ARC-1601 | <p><b>ARC-1601</b></p> 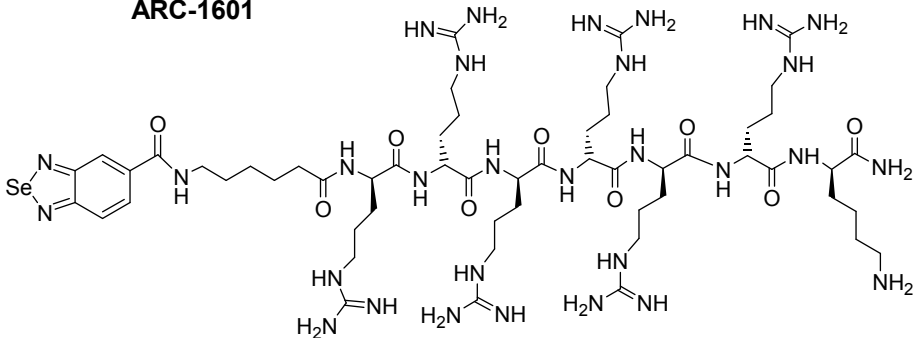 <p> <math>C_{55}H_{100}N_{30}O_9Se</math><br/>           Exact Mass: 1404,74547<br/>           Mol. Wt.: 1404,53810         </p>         | 1404.74524 |
| ARC-1602 | <p><b>ARC-1602</b></p>  <p> <math>C_{87}H_{136}N_{32}O_{16}S_2Se</math><br/>           Exact Mass: 2028,94187<br/>           Mol. Wt.: 2029,30882         </p> | 2028.94119 |
| ARC-1608 | <p><b>ARC-1608</b></p>  <p> <math>C_{55}H_{100}N_{30}O_9Se</math><br/>           Exact Mass: 1404,74547<br/>           Mol. Wt.: 1404,53810         </p>       | 1404.74411 |



|          |                                                                                                                                                                                                                                                    |            |
|----------|----------------------------------------------------------------------------------------------------------------------------------------------------------------------------------------------------------------------------------------------------|------------|
| ARC-1609 | <p><b>ARC-1609</b></p> 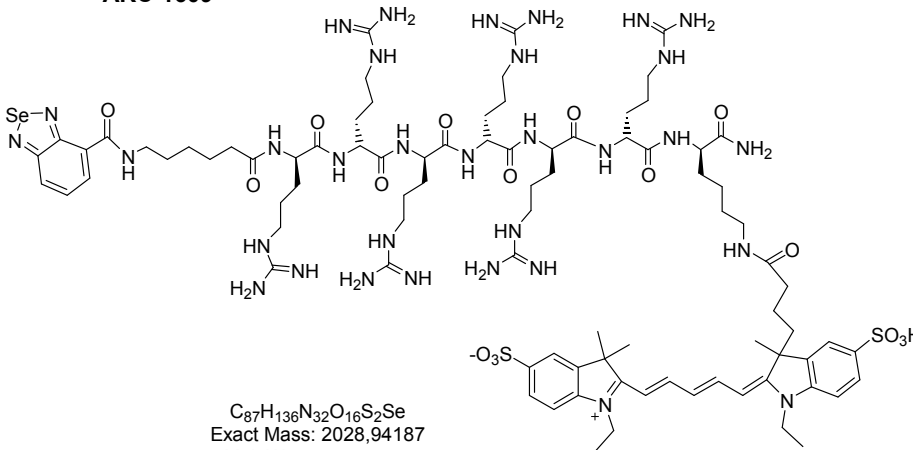 <p> <math>C_{87}H_{136}N_{32}O_{16}S_2Se</math><br/>           Exact Mass: 2028,94187<br/>           Mol. Wt.: 2029,30882         </p>   | 2028.93739 |
| ARC-3131 | <p><b>ARC-3131</b></p>  <p> <math>C_{58}H_{103}N_{31}O_9Se</math><br/>           Exact Mass: 1457,77202<br/>           Mol. Wt.: 1457,60072         </p>        | 1457.77195 |
| ARC-3132 | <p><b>ARC-3132</b></p>  <p> <math>C_{90}H_{139}N_{33}O_{16}S_2Se</math><br/>           Exact Mass: 2081,96842<br/>           Mol. Wt.: 2082,37148         </p> | 2081.97034 |

|          |                                                                                                                                                                                                                 |            |
|----------|-----------------------------------------------------------------------------------------------------------------------------------------------------------------------------------------------------------------|------------|
| ARC-3138 | <p><b>ARC-3138</b></p> 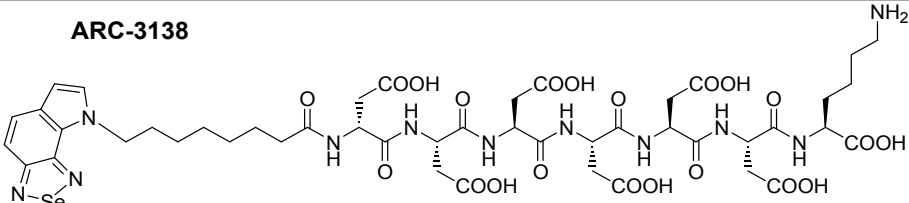 <p><math>C_{46}H_{61}N_{11}O_{21}Se</math><br/>Exact Mass: 1183,32087<br/>Mol. Wt.: 1182,99808</p>    | 1183.32244 |
| ARC-3141 | <p><b>ARC-3141</b></p>  <p><math>C_{78}H_{97}N_{13}O_{28}S_2Se</math><br/>Exact Mass: 1807,51727<br/>Mol. Wt.: 1807,76760</p> | 1807.51603 |
| ARC-3168 | <p><b>ARC-3168</b></p>  <p><math>C_{48}H_{63}N_{11}O_{22}Se</math><br/>Exact Mass: 1225,33144<br/>Mol. Wt.: 1225,03476</p>  | 1225.33282 |

## 7. Selectivity data

**Table S3.** Residual activities (%) of PKs in the presence of ARC-3138 (1  $\mu$ M). Data of CK2 is presented in yellow.

Selectivity testing was performed on the commercial basis at the Division of Signal Transduction

| Kinase        | Residual activity | Kinase         | Residual activity | Kinase         | Residual activity |
|---------------|-------------------|----------------|-------------------|----------------|-------------------|
| <b>CK2</b>    | <b>20</b>         | PRAK           | 87                | PKCz           | 95                |
| ERK8          | 53                | p38d MAPK      | 87                | STK33          | 95                |
| Aurora B      | 60                | CK1 $\gamma$ 2 | 87                | NUAK1          | 95                |
| GSK3b         | 63                | CHK1           | 87                | SIK2           | 95                |
| MLK1          | 65                | SIK3           | 88                | PKC $\gamma$   | 96                |
| TTK           | 68                | p38a MAPK      | 88                | p38b MAPK      | 96                |
| IGF-1R        | 69                | MKK2           | 88                | TESK1          | 96                |
| ERK2          | 70                | ERK1           | 89                | OSR1           | 96                |
| CDK2-Cyclin A | 72                | PKBb           | 89                | CHK2           | 98                |
| VEG-FR        | 72                | MAPKAP-K3      | 89                | p38g MAPK      | 98                |
| EPH-B3        | 73                | EPH-B1         | 89                | EPH-A4         | 98                |
| PLK1          | 74                | TGFBR1         | 89                | MAP4K5         | 98                |
| MST4          | 74                | TSSK1          | 89                | RIPK2          | 98                |
| TIE2          | 74                | IKKb           | 89                | IR             | 98                |
| IKKe          | 75                | MAP4K3         | 90                | MARK1          | 99                |
| MLK3          | 75                | HIPK2          | 90                | TAK1           | 99                |
| BTk           | 76                | PAK5           | 90                | PKBa           | 99                |
| PIM3          | 77                | JNK3           | 90                | PAK2           | 100               |
| CLK2          | 77                | TrkA           | 90                | MNK1           | 100               |
| JAK2          | 77                | DAPK1          | 90                | PAK4           | 100               |
| BRK           | 77                | IRAK4          | 90                | MNK2           | 101               |
| RSK1          | 78                | MSK1           | 91                | TTBK2          | 101               |
| CSK           | 78                | RSK2           | 91                | MST2           | 101               |
| TAO1          | 79                | CAMK1          | 91                | LKB1           | 101               |
| ROCK 2        | 80                | EPH-B2         | 91                | BRSK2          | 101               |
| MST3          | 80                | EIF2AK3        | 91                | CAMKKb         | 102               |
| Src           | 81                | NEK2a          | 91                | Aurora A       | 102               |
| SYK           | 81                | PRK2           | 91                | SmMLCK         | 103               |
| PDK1          | 81                | HER4           | 92                | PDGFRA         | 103               |
| PKD1          | 81                | PIM2           | 92                | HIPK3          | 104               |
| SRPK1         | 81                | AMPK (hum)     | 92                | ULK2           | 105               |
| DYRK2         | 82                | HIPK1          | 92                | IRAK1          | 105               |
| FGF-R1        | 82                | MARK3          | 92                | IRR            | 106               |
| MKK6          | 83                | MINK1          | 92                | PHK            | 106               |
| PKCa          | 84                | DYRK3          | 92                | ABL            | 106               |
| ERK5          | 84                | TBK1           | 92                | MAPKAP-K2      | 107               |
| EPH-B4        | 84                | BRSK1          | 93                | PKA            | 108               |
| JNK2          | 84                | PIM1           | 93                | ASK1           | 108               |
| EPH-A2        | 84                | MARK4          | 93                | PAK6           | 108               |
| GCK           | 84                | NEK6           | 93                | S6K1           | 109               |
| MARK2         | 85                | YES1           | 94                | MPSK1          | 110               |
| DYRK1A        | 85                | TTBK1          | 94                | MELK           | 111               |
| MKK1          | 85                | TLK1           | 94                | MEKK1          | 111               |
| CK1 $\delta$  | 85                | Lck            | 94                | DDR2           | 117               |
| ULK1          | 86                | WNK1           | 94                | CDK9-Cyclin TI | 119               |
| PINK          | 87                | EF2K           | 95                |                |                   |
| JNK1          | 87                | SGK1           | 95                |                |                   |

Therapy, University of Dundee. In the assays ATP was used at a concentration close to the ATP  $K_m$  value of the kinase.

## 8. ARC-Lum binding assay

### Binding assay with time-gated luminescence intensity detection

The binding curves were measured according to the protocol described previously.<sup>4</sup> Briefly, all biochemical binding experiments were performed on black low-volume 384-well non-bonding-surface microplates (Corning #3676) on a PHERAstar platereader (BMG Labtech) with TRF optical module [ $\lambda_{\text{ex}} = 337$  (50) nm,  $\lambda_{\text{em}} = 675$  (50) nm] when using the time-resolved fluorescence measurement mode or with fluorescence anisotropy module [ $\lambda_{\text{ex}} = 590$  (50) nm,  $\lambda_{\text{em}} = 675$  (50) nm] when using the fluorescence anisotropy readout. The microplates were incubated at 30 °C for 20 min before each measurement.

To characterize the binding of luminescence probe ARC-1602, ARC-1609, ARC-3132, ARC-3141 to PKAc, Pim-1 and CK2 $\alpha$ , the concentration series of kinases (3-fold dilutions) were made in the assay buffer and the fixed concentration of luminescent probe was added to each well.

In TRF mode, ARC-Lum probes were excited with a flash of the xenon lamp at 337 (50) nm, followed by 50  $\mu$ s delay time and subsequent acquisition (150  $\mu$ s) of the luminescence signal at 675(50) nm. The data were fitted with the aid of GraphPad Prism software version 5.0 (GraphPad Software, Inc.) and  $K_D$  values were calculated using nonlinear regression analysis:

$$TGL = B + M \frac{[L_t + K_D + kE_0 - \sqrt{(L_t + K_D + kE_0)^2 - 4L_t kE_0}]}{2} \quad (\text{Eq.1})$$

where  $B$  is the background signal;  $M$  is the luminescence intensity of the PK/ARC-Lum complex;  $L_t$  is the total concentration of ARC-Lum;  $E_0$  is the nominal concentration of the kinase;  $K_D$  is the dissociation constant between ARC-Lum and PK;  $k$  is the fraction of the active kinase.

### Measurement of luminescence lifetimes

The luminescence lifetimes of complexes of ARC-probes with kinases were measured on a PHERAstar platereader using the luminescence decay mode. The complex of ARC-Lum(Fluo) probe with kinases PKAc, Pim1 or CK2 $\alpha$  was excited with a flash of the xenon lamp at 337 nm, and the luminescence decay was subsequently recorded. Luminescence lifetime was calculated from the decay curves by using exponential decay function with the Prism software. Because of long afterglow of xenon flash-lamps minimal delay time of 50  $\mu$ s could be used time-gated measurements.

## Binding curve and decay curve: ARC-1602 and ARC-1609 with PKAc

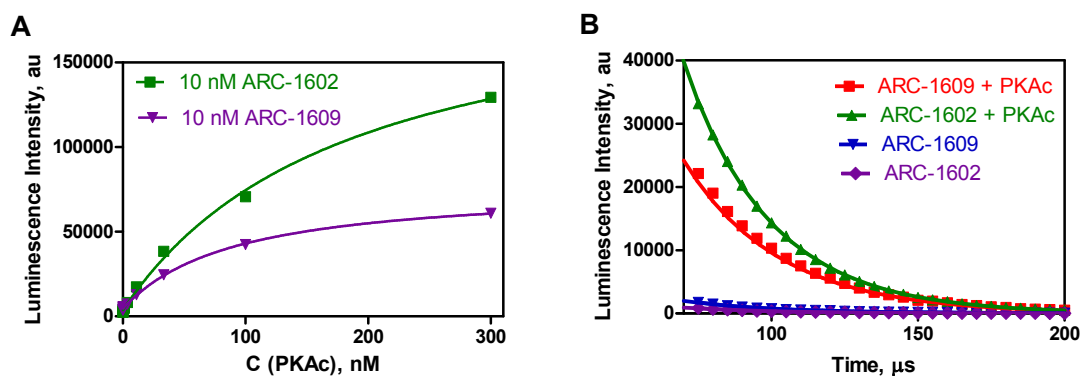

**Figur**

**e S2.** (A) Titration of ARC-1602 or ARC-1609 (both at 10 nM total concentration) with PKAc [ $\lambda_{\text{ex}} = 337$  (50) nm,  $\lambda_{\text{em}} = 675$  (50) nm]. ARC-1609:  $K_D = 152 \pm 46$  nM, ARC-1602:  $K_D = 84 \pm 30$ . (B) Decay curve of luminescence intensities of ARC-1602 and ARC-1609 in the presence or absence of PKAc [ $\lambda_{\text{ex}} = 337$  (50) nm,  $\lambda_{\text{em}} = 675$  (50) nm]. ARC-1602/PKAc:  $\tau = 29 \pm 3$  μs, ARC-1609/PKAc:  $\tau = 32 \pm 3$  μs.

## Decay curve: ARC-3132 with PKAc

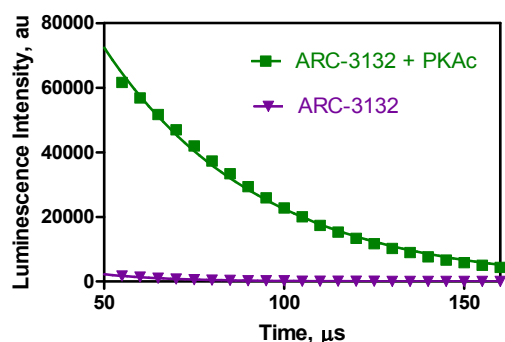

**Figure S3.** Decay curve of luminescence intensity of ARC-3132 (100 nM) in the presence or absence of PKAc (300 nM) [ $\lambda_{\text{ex}} = 337$  (50) nm,  $\lambda_{\text{em}} = 675$  (50) nm]. ARC-3132/PKAc:  $\tau = 43 \pm 2$  μs.

## Decay curve and binding curve: ARC-3141 with CK2 $\alpha$

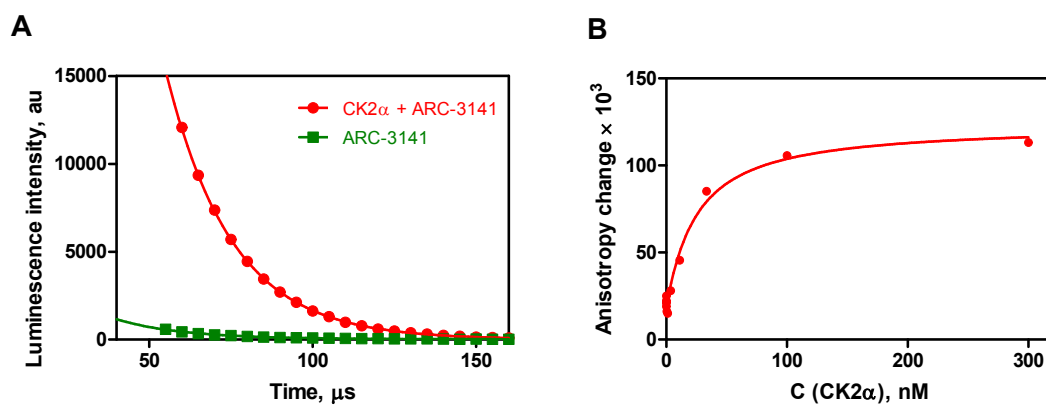

**Figure S4.** (A) Decay curve of luminescence intensities of ARC-3141 (30 nM) in the presence or absence of CK2 $\alpha^{1-335}$  (150 nM) [ $\lambda_{\text{ex}} = 337(50)$  nm,  $\lambda_{\text{em}} = 675(50)$  nm]. ARC-3141/CK2 $\alpha^{1-335}$ :  $\tau = 20 \pm 2$   $\mu$ s. (B) Titration of CK2 $\alpha^{1-335}$  with 5 nM ARC-3141 detected by fluorescence anisotropy [ $\lambda_{\text{ex}} = 590(50)$  nm,  $\lambda_{\text{em}} = 675(50)$  nm].

# **Luminescence intensities: ARC-3138, ARC-3141 with CK2 $\alpha$ and ARC-3131, ARC-3132 with PKAc**

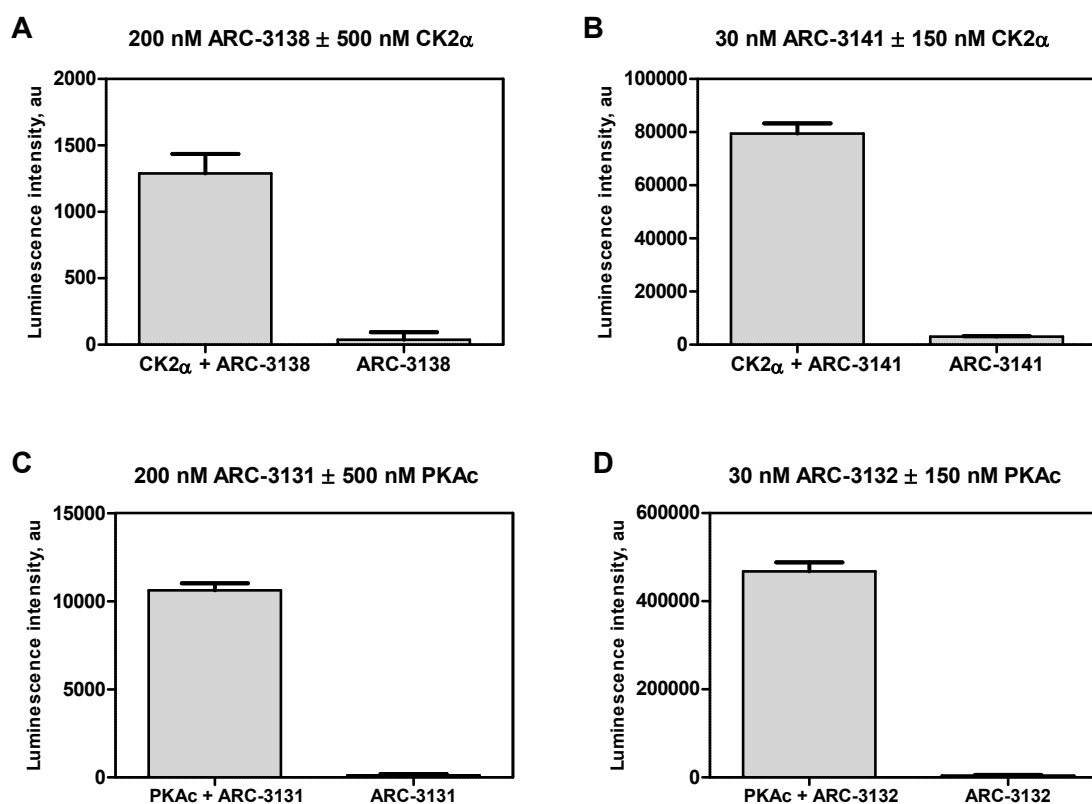

**Figure S5.** Luminescence intensities of compounds with and without fluorescent dyes, [ $\lambda_{\text{ex}} = 337$  (50) nm,  $\lambda_{\text{em}} = 675$  (50) nm, delay time 50  $\mu\text{s}$ , acquisition time 150  $\mu\text{s}$ , mean of three readings plotted with 95% confidence interval]. (A) ARC-3138 (200 nM) in the presence or absence of CK2 $\alpha^{1-335}$  (500 nM), (B) ARC-3141 (30 nM) in the presence or absence of CK2 $\alpha^{1-335}$  (150 nM), (C) ARC-3131 (200 nM) in the presence or absence of PKAc (500 nM), (D) ARC-3132 (30 nM) in the presence or absence of PKAc (150 nM).

## 9. Inhibition of CK2 $\alpha$ by ARC-3138 and ARC-3141

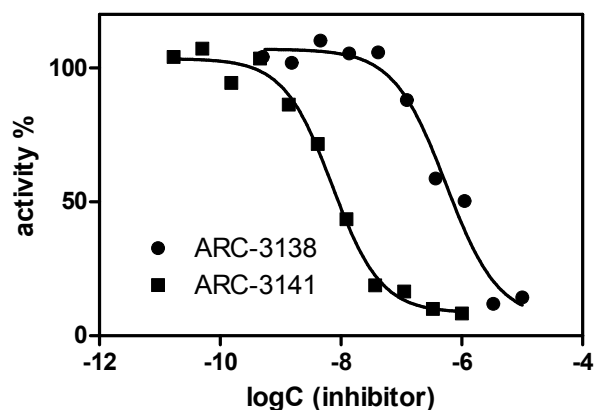

**Figure S6.** The inhibitory potencies of ARC-3138 and ARC-3141 were determined by TLC-based fluorometric phosphorylation assay as described previously<sup>5</sup> at the following concentrations of the reaction components: 5-TAMRA-RADDSDDDDDD (30  $\mu$ M), ATP (100  $\mu$ M), Mg(OAc)<sub>2</sub> (10 mM), CK2 $\alpha^{1-335}$  (0.6 nM) and 3-fold dilutions of the inhibitors. ARC-3138: IC<sub>50</sub> = 600  $\pm$  100 nM; ARC-3141: IC<sub>50</sub> = 8  $\pm$  5 nM.

## 10. Displacement of ARC-3138 and ARC-3168 from the complex with CK2 $\alpha$

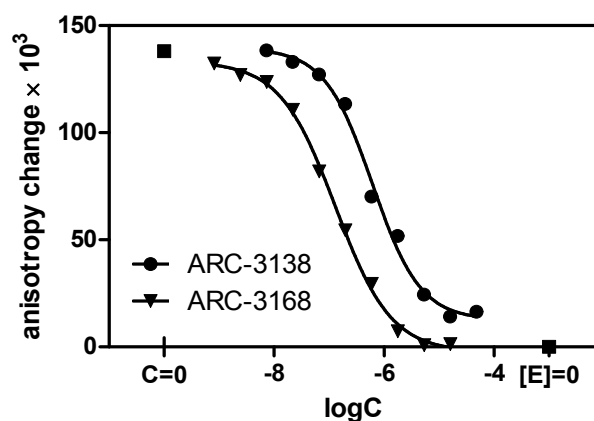

**Figure S7.** Displacement assay was carried out as described previously<sup>5</sup> at the following concentrations of the components: fluorescent probe (2 nM), CK2 $\alpha^{1-335}$  (3 nM) and 3-fold dilutions of ARC-3138 or ARC-3168. ARC-3138: IC<sub>50</sub> = 600 nM (logIC<sub>50</sub> = -6.22  $\pm$  0.06), K<sub>d</sub> = 82  $\pm$  22 nM; ARC-3168: IC<sub>50</sub> = 190 nM (logIC<sub>50</sub> = -6.73  $\pm$  0.07), K<sub>d</sub> = 34  $\pm$  10 nM.



## 11. Comparison of novel selenadiazole containing probe ARC-3132 with previously reported thiophene (ARC-1182) and selenophene (ARC-1139) containing probes

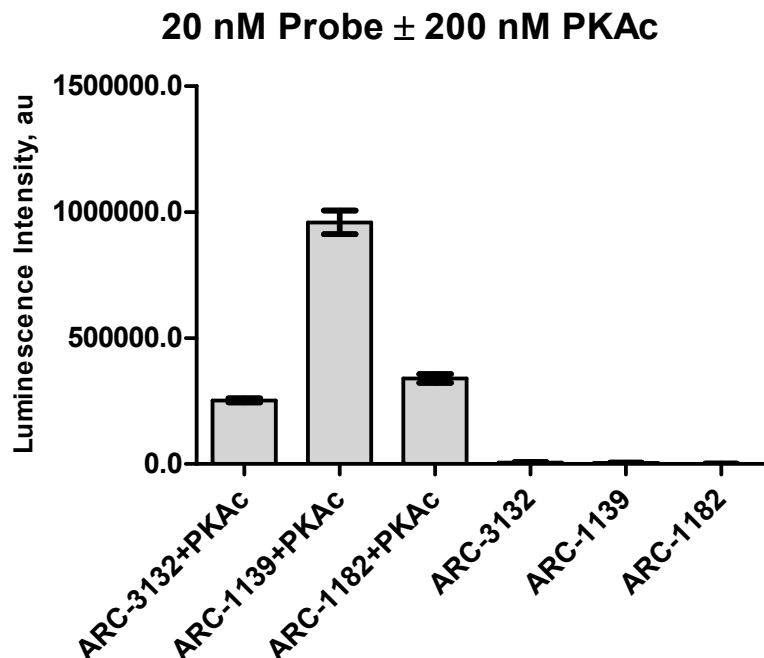

**Figure S8.** Luminescence intensities of compounds with and without fluorescent dyes [ $\lambda_{\text{ex}} = 337$  (50) nm,  $\lambda_{\text{em}} = 675$  (50) nm, delay time 50  $\mu\text{s}$ , acquisition time 150  $\mu\text{s}$ , mean of three readings plotted with 95% confidence interval]. ARC-3132, ARC-1139 and ARC-1182 (20 nM) in the presence or absence of PKAc (200 nM). All three probes are labelled with PromoFluor-647. It is important to note that current excitation wavelengths are ideal for ARC-1182 and ARC-1139, but not for ARC-3132.

## 12. References

1. A. N. Bullock, J. Debreczeni, A. L. Amos, S. Knapp and B. E. Turk, *J. Biol. Chem.*, 2005, **280**, 41675.
2. D. Lavogina, M. Lust, I. Viil, N. König, G. Raidaru, J. Rogozina, E. Enkvist, A. Uri and D. Bossemeyer, *J. Med. Chem.*, 2009, **52**, 308.
3. I. Ermakova, B. Boldyreff, O. G. Issinger and K. Niefind, *J. Mol. Biol.*, 2003, **330**, 925.
4. E. Enkvist, A. Vaasa, M. Kasari, M. Kriisa, T. Ivan, K. Ligi, G. Raidaru and A. Uri, *ACS Chem. Biol.*, 2011, **6**, 1052.
5. E. Enkvist, K. Viht, N. Bischoff, J. Vahter, S. Saaver, G. Raidaru, O.-G. Issinger, K. Niefind and A. Uri, *Org. Biomol. Chem.*, 2012, **10**, 8645.
